# Supplementary material for: Impacts of polyethylene glycol (PEG) dispersity on protein adsorption, pharmacokinetics, and biodistribution of PEGylated gold nanoparticles
Source: Royal Society of Chemistry journal article supplement (doi:10.1039/d4ra03153a), 2024-01-01
Supplement: d4ra03153a4.pdf [file d4ra03153a4.pdf]

## SUPPORTING INFORMATION

### **Impacts of Polyethylene glycol (PEG) Dispersity on Protein Adsorption, Pharmacokinetic, and Biodistribution of PEGylated Gold Nanoparticles**

Xinsheng Tian <sup>a, b</sup> and Yumin Yuan<sup>b, \*</sup>

<sup>a</sup> Institute of Smart Biomedical Materials, Zhejiang Sci-Tech University, Hangzhou 310018, China;

<sup>b</sup> Biomatrik Inc., 501 Changsheng South Road, Jiaxing, Zhejiang 314001, China.

E-mail address: [yyuan@biomatrik.com](mailto:yyuan@biomatrik.com)

The MALDI-TOF mass spectra of the raw material mPEG-HS are shown in Figure S1(a, b, and c).

Due to the reactivity of the thiol group, mPEG<sub>36</sub>-HS and mPEG<sub>45</sub>-HS show several unexplained mass peaks, but this does not affect their monodisperse characteristics.

Therefore, we characterized the starting material mPEG-OH for the synthesis of mPEG-HS using MALDI-TOF mass spectrometry, as shown in Figure S1(d, e, and f). Since modifying the end groups of PEG does not change its molecular weight distribution, we infer that mPEG-HS derived from monodisperse mPEG-OH remains monodisperse, while mPEG-HS derived from polydisperse mPEG2k-OH remains polydisperse. From the MALDI-TOF mass spectra of mPEG-OH, it can be seen that the mass spectrum of mPEG<sub>36</sub>-OH (Figure S1 e) is very clean, with molecular ion peaks  $[M+Na]^+$  at 1640.9 and  $[M+K]^+$  at 1656.9, which match the calculated molecular weight 1617.9 Da. Similarly, the mass spectrum of mPEG<sub>45</sub>-OH (Figure S1 f) shows molecular ion peaks  $[M+Na]^+$  at 2037.4 and  $[M+K]^+$  at 2053.4, which match the calculated molecular weight 2014.9 Da. The MALDI-TOF mass spectrum of polydisperse mPEG2k-OH shows a broad normal distribution of molecular weights, ranging from 1500-2500 Da.

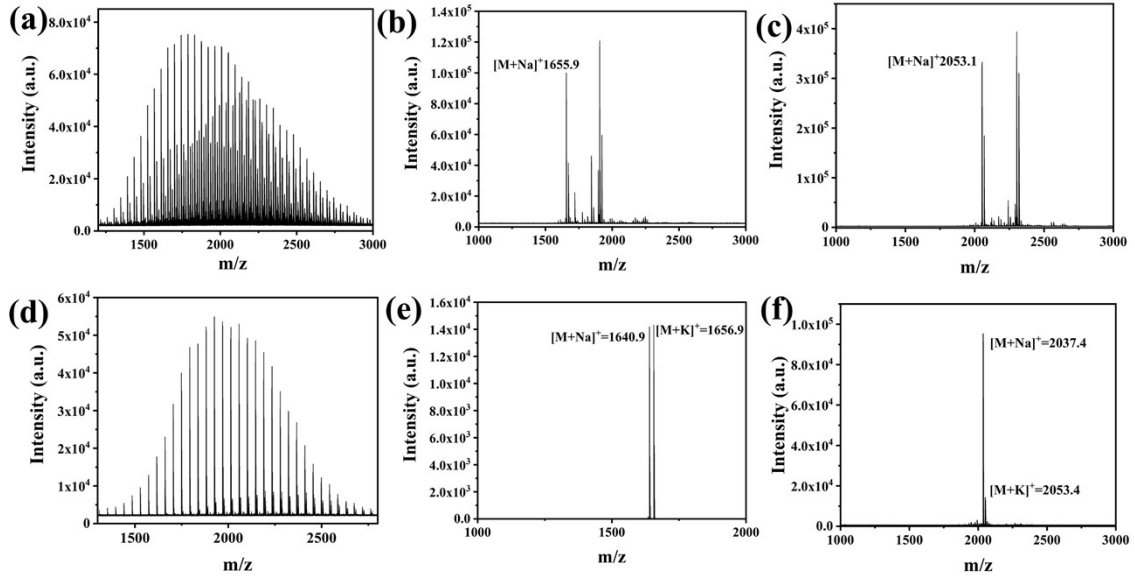

Figure S1 MALDI-TOF spectra of (a) mPEG2k-HS; (b) mPEG<sub>36</sub>-HS; (c) mPEG<sub>45</sub>-HS; (d) mPEG2k-OH; (e) mPEG<sub>36</sub>-OH; (f) mPEG<sub>45</sub>-OH.

The grafting density ( $\sigma$ ) can be calculated with the following equation: The mass fraction of polyethylene glycol ( $W_{PEG}\%$ ) and gold nanonucleus ( $W_{Au}\%$ ) was known from the TGA (Figure S1) data. The average radius ( $R_{Au}$ ) of the CTAB-capped AuNPs was  $22.7 \pm 2.0$  nm. The density of bulk gold ( $\rho_{Au}$ ) is  $19.3 \text{ g/cm}^3$ . NA is the Avogadro number.  $MW_{PEG}$  was the relative molecular mass of mPEG-SH.

$$\sigma = \frac{\frac{4}{3}\pi R_{Au}^3 W_{PEG}\% \rho_{Au} N_A}{4\pi R_{Au}^2 W_{Au}\% MW_{PEG}}$$

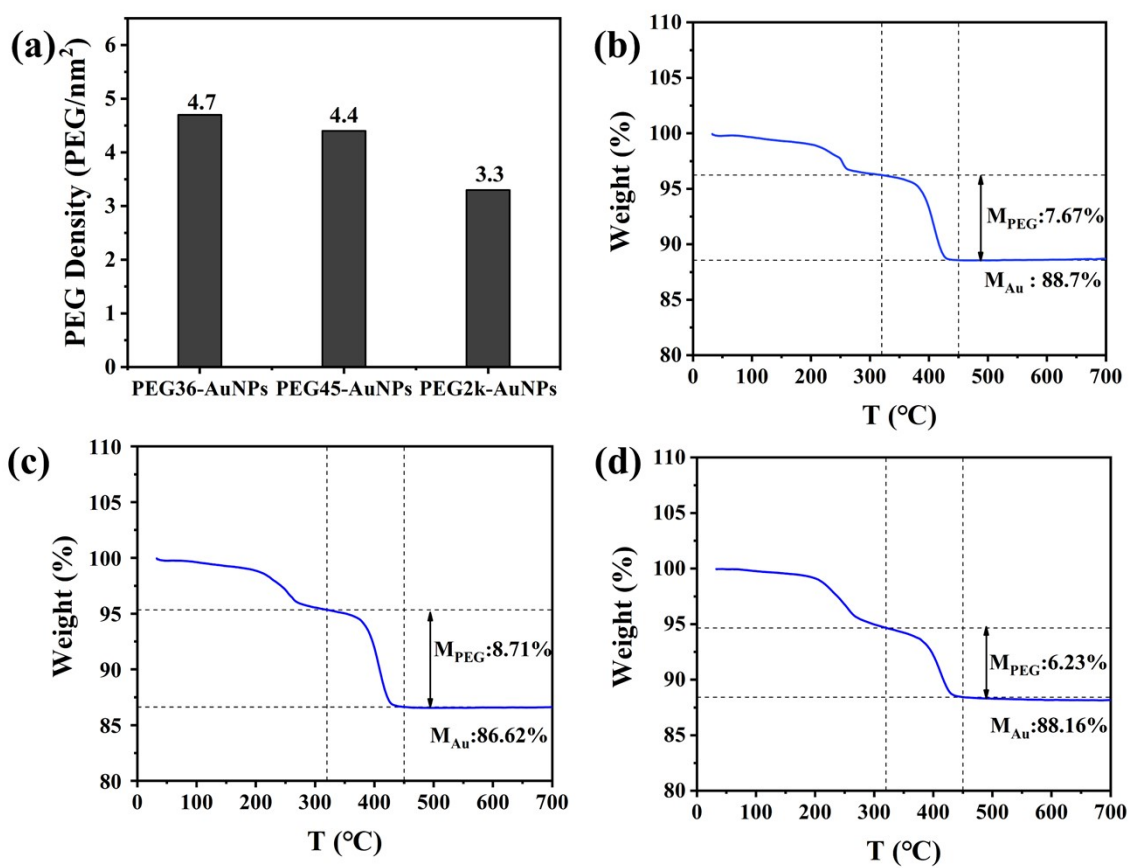

Figure S2 (a) Grafting density of PEG on the surface of AuNPs; TGA curves of (b) PEG<sub>36</sub>-AuNPs; (c) PEG<sub>45</sub>-AuNPs; (d) PEG<sub>2k</sub>-AuNPs.
