# Supplementary figures and images for: Impacts of polyethylene glycol (PEG) dispersity on protein adsorption, pharmacokinetics, and biodistribution of PEGylated gold nanoparticles
Source: Royal Society of Chemistry journal article supplement (doi:10.1039/d4ra03153a), 2024-01-01

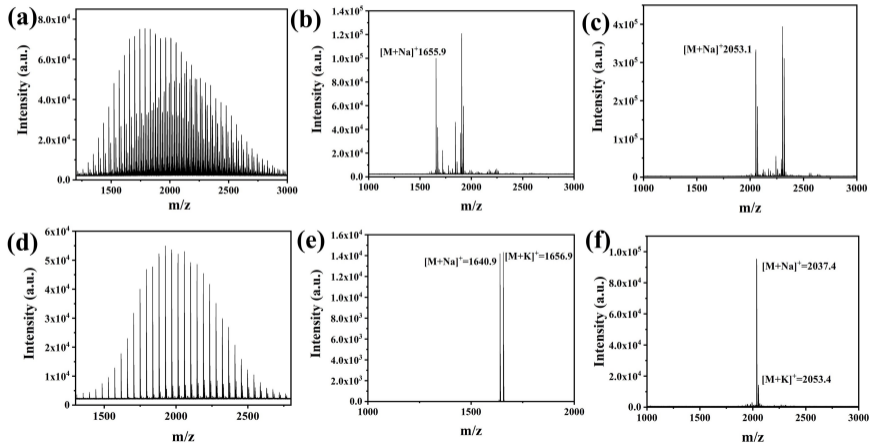

Supplement: d4ra03153a2.pdf [file d4ra03153a2.pdf]

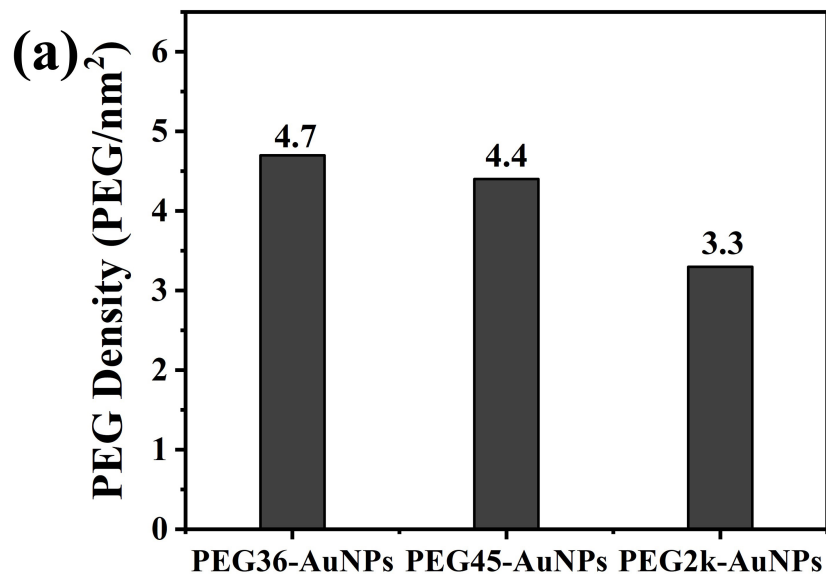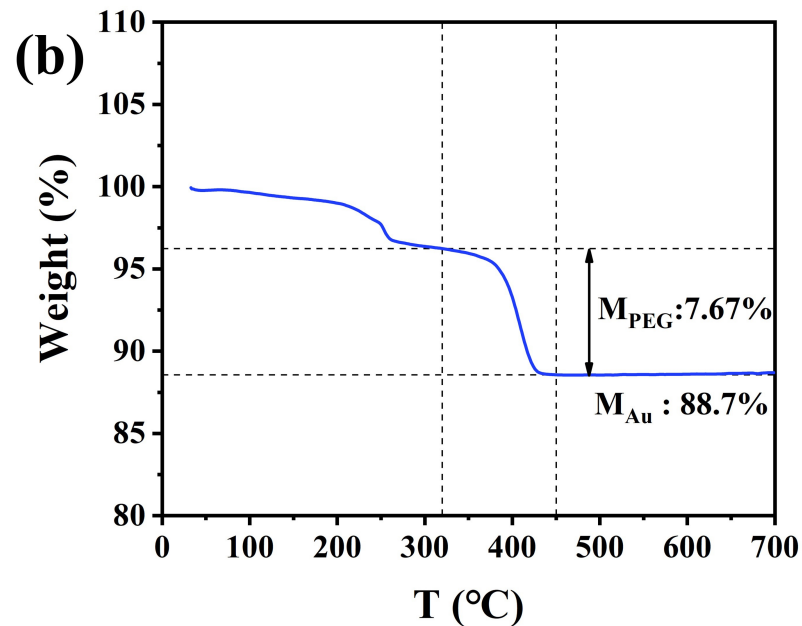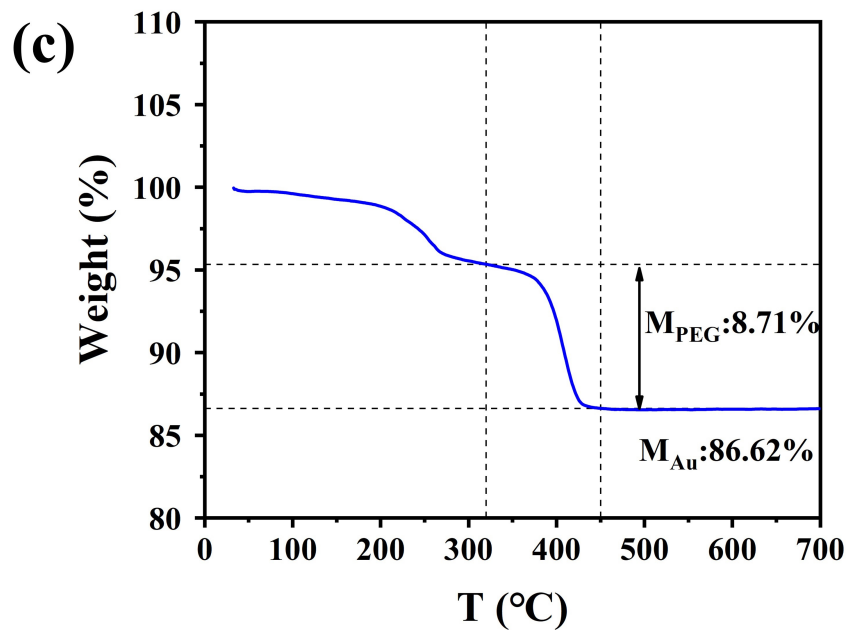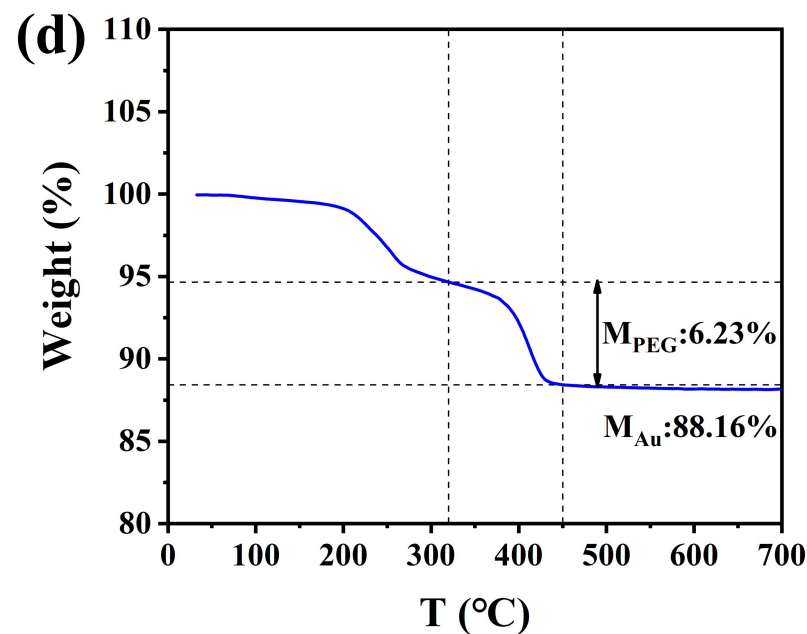

Supplement: d4ra03153a3.pdf [file d4ra03153a3.pdf]
